# Supplementary material
Source: MDPI journal article supplement (https://www.mdpi.com/1424-2818/11/7/109)
Supplement: s1 [file s1]

(2019 version)

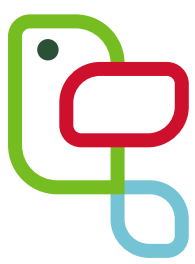

**OPEN  
WINGS**  
PROJECT

-- **Palaeognathae**: a = Struthioniformes; b = Rheiformes; c = Casuariiformes; d = Aepyornithiformes; e = Apterygiformes; f = Dinornithiformes; g = Tinamiformes  
**Neoaves**: primary tree = Anseriformes; subtree A = Galliformes  
-- **Galloaves: clade Ia** (a = Cariamiiformes; b = Falconiformes; subtree B = Psittaciformes and Passeriformes); **clade Ib** (a = Accipitriformes; b = Strigiformes; c = Coliiformes; d = Leptosomiformes; e = Trogoniformes; f = Bucerotiformes; g = Piciformes; h = Coraciiformes); **clade II** (a = Gaviiformes; b = Sphenisciformes; c = Procellariiformes; d = Ciconiiformes; e = Suliformes; f = Pelecaniformes); **clade III** (a = Eurypygiformes; b = Phaethontiformes); **clade IV** (a = Otidiformes; b = Musophagiformes; c = Cuculiformes); **clade V** (a = Caprimulgiformes [not monophyletic]; b = Apodiformes); **clade VI** (a = Mesitornithiformes; b = Pteroclimiformes; c = Columbiformes); **clade VII** (a = Phoenicopteriformes; b = Podicipediformes); the three "orphan orders" (Charadriiformes, Gruiformes, and Opisthocomiformes) are indicated on the tree.
