# Supplementary material
Source: MDPI journal article supplement (https://www.mdpi.com/1424-2818/11/7/109)
Supplement: s1 [file s1]

## Color Scheme for OW\_2019 Supertrees

We have used a consistent color scheme for tree figures. The colors indicate the major clades (Palaeognathae, Galloanseres, and the "magnificent seven" and "orphan orders" within Neoaves). Colors are presented along with hex RGB values. Note that, although Passeriformes is nested within Telluraves, it is assigned its own color.

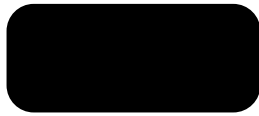

Palaeognathae  
000000

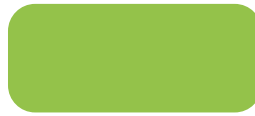

Galloanseres  
94C24A

### Neoaves

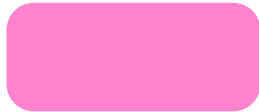

Mirandornithes  
Neoaves clade VII  
FF84CD

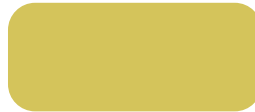

Charadriiformes  
Neoaves "orphan"  
D4C45B

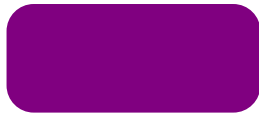

Columbimorphae  
Neoaves clade VI  
80004A

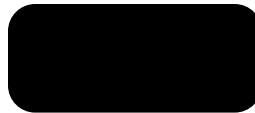

Opisthocomiformes  
Neoaves "orphan"  
000000

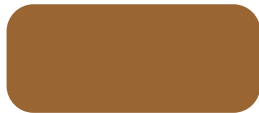

Strisores  
Neoaves clade V  
996633

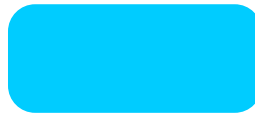

Phaethontimorphae  
Neoaves clade III  
00CCFF

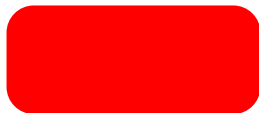

Otidimorphae  
Neoaves clade IV  
FF0000

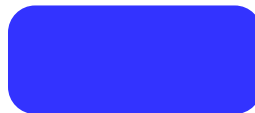

Aequornithes  
Neoaves clade II  
3333FF

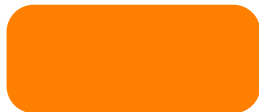

Gruiformes  
Neoaves "orphan"  
FF8000

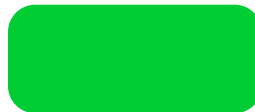

Telluraves  
Neoaves clade I  
00CC33

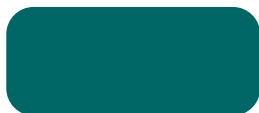

Passeriformes  
nested within Neoaves clade I  
006666
